# Supplementary material for: Epidemiology of Concomitant Infection Due to Loa loa and Mansonella perstans in Gabon
Source: PLoS Negl Trop Dis. 2011 Oct 11;5(10):e1329. doi: 10.1371/journal.pntd.0001329 (PMC3191124; doi:10.1371/journal.pntd.0001329)
Supplement: Figure S1 — Questionnaire. (PDF) [file pntd.0001329.s002.pdf]

MINISTERE DE LA SANTE PUBLIQUE  
.....  
SECRETARIAT GENERAL  
.....  
DIRECTION GENERALE DE LA SANTE  
.....  
DIRECTION GENERALE ADJOINTE  
CHARGEE DES PROGRAMMES ET  
SERVICES NATIONAUX  
.....

REPUBLIQUE GABONAISE  
Union – Travail – Justice

|                                    |
|------------------------------------|
| <b>FORMULAIRE ENQUÊTE FILAIRES</b> |
|------------------------------------|

**ENQUETEUR :** ..... **DATE :**     /     /     /

**N° IDENTIFICATION :** .....

**NOM et PRENOM :** .....

**Accord pour le dépistage**

**SIGNATURE :** .....

**CARACTERISTIQUES SOCIO-DEMOGRAPHIQUES :**

Age : \_\_\_\_\_ Sexe : \_\_\_\_\_

Nombre de personnes vivant dans le foyer : \_\_\_\_\_

Lieu de naissance : \_\_\_\_\_ Nationalité : \_\_\_\_\_

Depuis combien de temps habitez-vous à ..... : \_\_\_\_\_

Statut matrimonial :     Marié(e)     Veuf     Divorcé(e)     Concubinage     Célibataire

Nombre de partenaires/ épouses / co-épouses :    Aucun     1     2     3     Plus

Nombre d'enfants à charge : \_\_\_\_\_     Age du dernier enfant : \_\_\_\_\_

Niveau d'éducation :     Jamais scolarisé     Etudes primaires  
                                     Etudes secondaires     Etudes universitaires

Profession et/ou occupation principale : \_\_\_\_\_

## **ANTECEDENTS MEDICAUX**

Scarification : OUI / NON

Tatouage : OUI / NON

Avez-vous déjà été opéré ? : OUI / NON si OUI, quelle année ? \_\_\_\_\_  
De quoi ? \_\_\_\_\_

Avez-vous déjà reçu des injections durant les 6 derniers mois ? : OUI / NON

Avez-vous déjà reçu une transfusion sanguine ? : OUI / NON, si OUI, date de la dernière : \_\_\_\_\_

Avez-vous déjà été hospitalisé ? : OUI / NON si OUI, nombre de fois : \_\_\_\_\_

Motifs : \_\_\_\_\_

Nombre d'accouchements : \_\_\_\_\_ A domicile : \_\_\_\_\_ Dans une structure sanitaire : \_\_\_\_\_

Avortements : OUI / NON si OUI, combien ? \_\_\_\_\_

## **QUESTIONS RELATIVES AUX FILAIRES**

Avez-vous ou avez-vous eu au cours des 12 derniers mois, ou avant, les symptômes suivants :

- Passage oculaire de filaires OUI / NON
- Des œdèmes douloureux des membres: OUI / NON
- Des démangeaisons : OUI / NON
- Des lésions cutanées type nodules: OUI / NON
- Des arthralgies ou arthrites : OUI / NON
- Un hydrocèle : OUI / NON
- Un éléphantiasis : OUI / NON

## **QUESTIONS D'ORDRE GENERAL**

Avez-vous récemment présenté les symptômes suivants :

- Toux nocturne: OUI / NON
- Fièvres fréquentes : OUI / NON
- Pertes (vaginales et/ou urétrales) : OUI / NON
- Douleurs abdominales/ Rate/ Foie : OUI / NON
- Troubles neurologiques : OUI / NON, si OUI, lesquels : Epilepsie, Polynévrite, Paralyse, Autres
- Ganglions : OUI / NON si OUI, localisation : .....

---

## **HABITUDES DE VIE**

Etes-vous chasseur ? : OUI / NON , si OUI, pratiquez-vous : La chasse de proximité La chasse profonde  
Quels animaux  
Comment : Par le filet/ Piège/ Fusil

Consommez-vous du gibier ? : OUI / NON, Si OUI, lesquels ? Singe Rat Palmiste  
Ecureuil Gazelle Antilope Porc Epic  
Chauves-souris

Cuisinez-vous le gibier ? OUI / NON, Le dépecez-vous ? OUI / NON

Avez-vous déjà gardé des animaux sauvages ? : OUI / NON si OUI, lesquels ? : \_\_\_\_\_

---

## **ENQUÊTE SANTÉ**

Bon pour résultat du test sanguin à venir chercher au Centre Médical de votre localité.

ATTENTION, par souci d'anonymat, seul ce document permet de récupérer ses résultats. Toute perte de ce document signifie la perte définitive des résultats.

N° D'IDENTIFICATION : .....

Signature pour accord :

Le patient qui désire connaître ses résultats doit impérativement signer à la fois ce bon et la fiche qui y est associée. Il faut assurer aux patients le caractère très confidentiel du rendu des résultats. Seul le bon permet de récupérer ses résultats. En cas de perte, tout rendu est impossible.

En cas de positivité, un nouveau prélèvement sera proposé pour confirmation du résultat comme le demande la procédure légale.

---
